# Supplementary material for: BROCKMAN: deciphering variance in epigenomic regulators by k-mer factorization
Source: PubMed Central journal article supplement (PMC6029352; doi:10.1186/s12859-018-2255-6), 2018-07-03

Figure S1

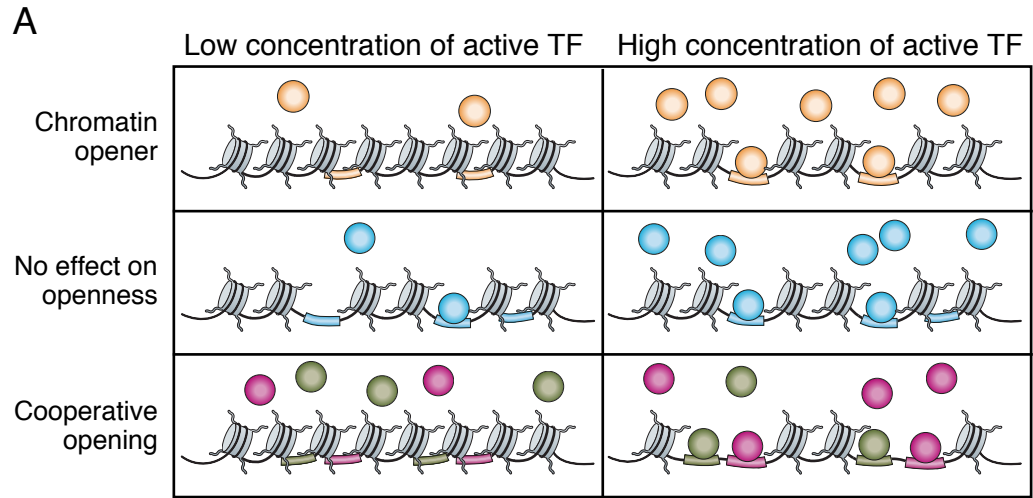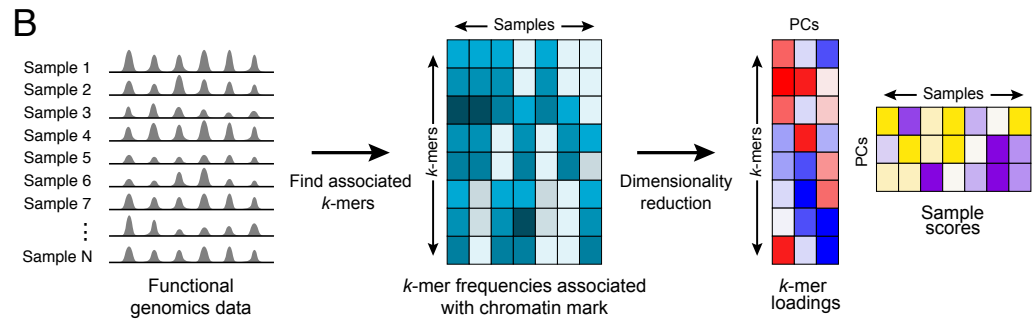

Supplement: 12859_2018_2255_MOESM1_ESM.pdf [file 12859_2018_2255_MOESM1_ESM.pdf]
